# Supplementary material
Source: publisher figshare collection journal article supplement (https://frontiersin.figshare.com/ndownloader/files/35455742)
Supplement: Supplementary file 1 [file 35455742]

## Sheet: O18-G.inflata
Sample	Depth (cm)	Age(kyr)	δ18O(‰)	Test Species
Set8-1	0.53	1.01793	0.144618	G.inflata
Set8-3	2.65	3.43885	0.533903	G.inflata
Set8-5	4.77	4.17753	0.131141	G.inflata
Set8-7	6.89	4.91621	0.440476	G.inflata
Set8-9	9.01	5.65488	0.365444	G.inflata
Sec9-1	11.365	6.47544	0.351631	G.inflata
Sec9-3	13.625	7.2629	0.238495	G.inflata
Sec9-5	15.885	8.05035	0.380303	G.inflata
Sec9-7	18.145	8.83781	0.517513	G.inflata
Sec9-9	20.405	9.62526	0.432107	G.inflata
Sec9-11	22.6625	10.4119	0.309491	G.inflata
Sec9-13	24.9125	11.1958	0.602018	G.inflata
Sec9-15	27.1625	11.9798	0.697939	G.inflata
Sec9-17	29.4125	12.7638	0.216995	G.inflata
Sec9-19	31.6812	13.5543	0.930433	G.inflata
Sec9-21	33.9425	14.2548	0.87982	G.inflata
Sec9-23	36.1825	14.8721	1.15546	G.inflata
Sec9-25	38.4225	15.4894	1.29938	G.inflata
Sec9-27	40.6625	16.1067	1.32265	G.inflata
Sec9-29	42.9237	16.7299	1.53679	G.inflata
Sec9-31	45.2488	17.6831	1.27006	G.inflata
Sec9-33	47.5737	18.9503	1.49723	G.inflata
Sec9-35	49.8987	20.2175	1.46018	G.inflata
Sec9-37	52.2175	21.4813	1.28564	G.inflata
Sec9-39	54.5175	22.7348	1.2426	G.inflata
Sec9-41	56.8175	23.9884	1.12766	G.inflata
Sec9-43	59.1175	25.2419	1.2101	G.inflata
Sec9-45	61.4175	26.4955	1.36312	G.inflata
Sec9-47	63.6987	27.9915	1.34089	G.inflata
Sec9-49	65.9237	29.7159	1.19283	G.inflata
Sec9-51	68.1488	31.4403	1.13608	G.inflata
Sec9-53	70.3737	33.1647	1.28259	G.inflata
Sec9-55	72.6112	34.8987	1.04157	G.inflata
Sec9-57	74.8863	36.6618	0.889459	G.inflata
Sec9-59	77.1612	38.425	1.36386	G.inflata
Sec9-61	79.4363	40.1881	0.584948	G.inflata
Sec9-63	81.6975	41.9406	0.958965	G.inflata
Sec9-65	83.9175	43.6611	1.23222	G.inflata
Sec9-67	86.1375	45.3816	0.700498	G.inflata
Sec9-69	88.3575	47.1021	0.716403	G.inflata
Sec9-71	90.5775	48.8226	0.673416	G.inflata
Sec9-73	92.8238	50.5634	0.884887	G.inflata
Sec9-75	95.1488	52.3653	0.888843	G.inflata
Sec9-77	97.4737	54.1672	1.22785	G.inflata
Sec9-79	99.7987	55.969	0.961333	G.inflata
Sec9-81	102.192	57.8242	1.06906	G.inflata
Sec9-83	104.793	59.8392	1.65347	G.inflata
Sec9-85	107.392	60	1.13127	G.inflata
Sec10-1	109.903	61.608	0.681457	G.inflata
Sec10-3	112.142	63.295	0.815022	G.inflata
Sec10-5	114.382	64.8005	0.91496	G.inflata
Sec10-7	116.623	66.306	0.811751	G.inflata
Sec10-9	118.862	67.8116	1.11723	G.inflata
Sec10-11	121.13	69.3171	0.727076	G.inflata
Sec10-13	123.48	70.8411	0.701251	G.inflata
Sec10-15	125.83	72.4205	0.899251	G.inflata
Sec10-17	128.18	74	0.793694	G.inflata
Sec10-19	130.512	75.3103	0.518433	G.inflata
Sec10-21	132.792	76.6109	0.328915	G.inflata
Sec10-23	135.072	77.8823	0.703174	G.inflata
Sec10-25	137.352	79.1536	0.152191	G.inflata
Sec10-27	139.632	80.4249	0.512932	G.inflata
Sec10-29	141.905	81.6962	0.281978	G.inflata
Sec10-31	144.155	82.9633	0.368858	G.inflata
Sec10-33	146.405	84.2179	0.577744	G.inflata
Sec10-35	148.655	85.4725	0.75199	G.inflata
Sec10-37	150.917	86.7271	0.500343	G.inflata
Sec10-39	153.218	87.9887	0.457401	G.inflata
Sec10-41	155.52	89.2711	/	/
Sec10-43	157.817	91.8361	0.671584	G.inflata
Sec10-45	160.132	93.1269	0.371889	G.inflata
Sec10-47	162.493	94.4428	0.544111	G.inflata
Sec10-49	164.852	95.7588	0.472484	G.inflata
Sec10-51	167.213	97.0747	0.554784	G.inflata
Sec10-53	169.572	98.3906	0.219274	G.inflata
Sec10-55	171.911	99.6947	0.7062	G.inflata
Sec10-57	174.19	104.761	/	/
Sec10-59	176.46	105.999	/	/
Sec10-61	178.74	107.237	/	/
Sec10-63	180.998	108.475	0.101342	G.inflata
Sec10-65	183.218	109.713	0.462639	G.inflata
Sec10-67	185.438	110.958	0.24676	G.inflata
Sec10-69	187.657	112.227	0.547623	G.inflata
Sec10-71	189.877	113.495	0.826322	G.inflata
Sec10-73	192.111	114.764	0.71795	G.inflata
Sec10-75	194.386	114.799	0.892471	G.inflata
Sec10-77	196.661	116.018	0.530428	G.inflata
Sec10-79	198.936	117.231	0.878043	G.inflata
Sec10-81	201.186	118.444	0.794126	G.inflata
Sec10-83	203.361	119.657	0.389793	G.inflata
Sec10-85	205.536	120.895	-0.248075	G.inflata
Sec10-87	207.711	122.211	0.0932095	G.inflata
Sec10D-1	209.933	123.527	0.0559925	G.inflata
Sec10D-3	212.292	124.843	0.313438	G.inflata
Sec10D-5	214.653	126.159	0.131448	G.inflata
Sec10D-7	217.012	127.463	-0.120601	G.inflata
Sec10D-9	219.373	128.731	0.0167941	G.inflata
Sec10D-11	221.711	130	-0.0899622	G.inflata
Sec10D-13	223.986	131.236	-0.0170095	G.inflata
Sec10D-15	226.261	132.474	1.21852	G.inflata
Sec10D-17	228.536	133.713	1.03876	G.inflata
Sec10D-19	230.812	134.952	0.727492	G.inflata
Sec10D-21	233.093	136.191	1.06937	G.inflata
Sec10D-23	235.373	136.38	1.03396	G.inflata
Sec10D-25	237.653	137.43	1.36488	G.inflata
Sec10D-27	239.933	138.64	1.10635	G.inflata
Sec10D-29	242.159	139.763	1.36585	G.inflata
Sec10D-31	244.226	140.887	1.27841	G.inflata
Sec10D-33	246.292	142.036	1.14594	G.inflata
Sec11-1	248.407	143.264	1.04109	G.inflata
Sec11-3	250.667	144.493	1.00833	G.inflata
Sec11-5	252.928	145.721	1.195	G.inflata
Sec11-7	255.188	146.949	1.12968	G.inflata
Sec11-9	257.447	148.179	1.346	G.inflata
Sec11-11	259.711	149.416	1.16898	G.inflata
Sec11-13	261.986	150.652	0.956869	G.inflata
Sec11-15	264.261	151.889	1.46326	G.inflata
Sec11-17	266.536	153.123	1.16203	G.inflata
Sec11-19	268.808	154.351	1.18197	G.inflata
Sec11-21	271.067	155.579	1.25836	G.inflata
Sec11-23	273.327	156.808	1.15404	G.inflata
Sec11-25	275.587	158.036	1.45198	G.inflata
Sec11-27	277.848	159.27	1.52431	G.inflata
Sec11-29	280.118	160.52	1.66155	G.inflata
Sec11-31	282.418	161.77	1.04458	G.inflata
Sec11-33	284.717	163.02	1.10845	G.inflata
Sec11-35	287.017	164.276	1.07659	G.inflata
Sec11-37	289.33	165.554	1.49936	G.inflata
Sec11-39	291.68	166.831	0.741197	G.inflata
Sec11-41	294.03	168.108	1.06802	G.inflata
Sec11-43	296.38	169.37	0.825654	G.inflata
Sec11-45	298.702	170.588	1.16103	G.inflata
Sec11-47	300.942	171.805	0.759946	G.inflata
Sec11-49	303.182	173.022	1.47204	G.inflata
Sec11-51	305.423	174.24	0.937781	G.inflata
Sec11-53	307.663	175.459	0.79166	G.inflata
Sec11-55	309.905	176.681	1.1507	G.inflata
Sec11-57	312.155	177.904	1.41005	G.inflata
Sec11-59	314.405	179.127	1.03509	G.inflata
Sec11-61	316.655	180.351	1.34885	G.inflata
Sec11-63	318.908	185	1.25456	G.inflata
Sec11-65	321.168	186.772	1.97298	G.inflata
Sec11-67	323.428	188.422	1.37228	G.inflata
Sec11-69	325.687	190.071	1.18235	G.inflata
Sec11-71	327.947	191.728	1.08729	G.inflata
Sec11-73	330.217	193.407	1.25732	G.inflata
Sec11-75	332.517	195.086	0.637668	G.inflata
Sec11-77	334.817	196.765	1.75082	G.inflata
Sec11-79	337.117	198.48	0.90853	G.inflata
Sec11-81	339.467	200.305	0.847184	G.inflata
Sec11-83	341.967	202.13	1.01439	G.inflata
Sec11-85	344.467	203.954	0.859187	G.inflata
Sec11-87	346.967	205.739	0.916895	G.inflata
Sec12-1	349.412	207.403	0.968964	G.inflata
Sec12-3	351.692	209.068	0.830127	G.inflata
Sec12-5	353.972	210.732	1.15455	G.inflata
Sec12-7	356.252	212.396	0.907741	G.inflata
Sec12-9	358.532	214.064	0.50046	G.inflata
Sec12-11	360.817	215.743	0.627142	G.inflata
Sec12-13	363.117	217.422	0.611352	G.inflata
Sec12-15	365.417	219.1	0.476434	G.inflata
Sec12-17	367.717	220.772	0.637241	G.inflata
Sec12-19	370.007	222.422	0.672078	G.inflata
Sec12-21	372.267	224.071	1.08902	G.inflata
Sec12-23	374.527	225.721	0.465325	G.inflata
Sec12-25	376.787	227.37	1.37127	G.inflata
Sec12-27	379.047	229.027	0.45086	G.inflata
Sec12-29	381.317	230.706	1.15551	G.inflata
Sec12-31	383.617	232.385	1.15355	G.inflata
Sec12-33	385.917	234.064	1.45655	G.inflata
Sec12-35	388.217	235.734	0.802718	G.inflata
Sec12-37	390.505	237.376	1.15293	G.inflata
Sec12-39	392.755	239.018	1.09518	G.inflata
Sec12-41	395.005	240.661	1.52405	G.inflata
Sec12-43	397.255	242.308	0.767001	G.inflata
Sec12-45	399.512	243.973	0.711999	G.inflata
Sec12-47	401.792	245.637	0.546598	G.inflata
Sec12-49	404.072	247.301	0.950055	G.inflata
Sec12-51	406.352	248.965	0.857689	G.inflata
Sec12-53	408.632	250.642	1.46772	G.inflata
Sec12-55	410.93	252	1.3892	G.inflata
Sec12-57	413.28	253.296	1.68393	G.inflata
Sec12-59	415.63	254.453	1.4071	G.inflata
Sec12-61	417.98	255.597	1.65531	G.inflata
Sec12-63	420.302	256.701	1.40979	G.inflata
Sec12-65	422.542	257.804	1.55128	G.inflata
Sec12-67	424.782	258.908	1.36239	G.inflata
Sec12-69	427.022	260.011	1.0078	G.inflata
Sec12-71	429.262	261.125	1.31335	G.inflata
Sec12-73	431.524	262.27	1.48734	G.inflata
Sec12-75	433.849	263.416	1.48774	G.inflata
Sec12-77	436.174	264.561	1.56997	G.inflata
Sec12-79	438.499	265.7	1.76296	G.inflata
Sec12-81	440.811	266.821	1.72021	G.inflata
Sec12-83	443.086	267.942	1.13032	G.inflata
Sec12-85	445.361	269.062	1.31673	G.inflata
Sec12-87	447.636	270.181	1.43218	G.inflata
Sec13-1	449.907	271.294	1.82969	G.inflata
Sec13-3	452.167	272.408	1.35511	G.inflata
Sec13-5	454.427	273.521	1.56389	G.inflata
Sec13-7	456.687	274.634	1.80293	G.inflata
Sec13-9	458.947	275.746	1.7239	G.inflata
Sec13-11	461.205	276.855	1.60024	G.inflata
Sec13-13	463.455	277.963	1.28865	G.inflata
Sec13-15	465.705	279.071	1.47468	G.inflata
Sec13-17	467.955	280.181	1.22942	G.inflata
Sec13-19	470.207	281.294	1.4886	G.inflata
Sec13-21	472.467	282.408	1.64928	G.inflata
Sec13-23	474.727	283.521	1.30049	G.inflata
Sec13-25	476.987	284.634	1.356	G.inflata
Sec13-27	479.247	285.728	1.25995	G.inflata
Sec13-29	481.467	286.762	1.26935	G.inflata
Sec13-31	483.567	287.797	1.00678	G.inflata
Sec13-33	485.667	288.831	0.830919	G.inflata
Sec13-35	487.767	290	0.689363	G.inflata
Sec13-37	489.957	291.475	1.40215	G.inflata
Sec13-39	492.417	292.951	1.18932	G.inflata
Sec13-41	494.877	294.426	1.13767	G.inflata
Sec13-43	497.337	295.901	1.15851	G.inflata
Sec13-45	499.797	297.349	0.866879	G.inflata
Sec13-47	502.211	298.713	0.963822	G.inflata
Sec13-49	504.486	300.077	0.974986	G.inflata
Sec13-51	506.761	301.442	1.59462	G.inflata
Sec13-53	509.036	302.813	1.13576	G.inflata
Sec13-55	511.324	304.208	1.00712	G.inflata
Sec13-57	513.649	305.602	1.40873	G.inflata
Sec13-59	515.974	306.996	1.58488	G.inflata
Sec13-61	518.299	308.381	1.72274	G.inflata
Sec13-63	520.607	309.736	1.01023	G.inflata
Sec13-65	522.867	311.091	1.07798	G.inflata
Sec13-67	525.127	312.447	1.13118	G.inflata
Sec13-69	527.387	313.802	1.24175	G.inflata
Sec13-71	529.647	315.16	1.20203	G.inflata
Sec13-73	531.911	316.524	1.39541	G.inflata
Sec13-75	534.186	317.888	1.05403	G.inflata
Sec13-77	536.461	319.253	0.81565	G.inflata
Sec13-79	538.736	320.609	1.06363	G.inflata
Sec13-81	540.999	321.944	1.05031	G.inflata
Sec13-83	543.224	323.278	0.860543	G.inflata
Sec13-85	545.449	324.612	0.821328	G.inflata
Sec13-87	547.674	325.952	0.569531	G.inflata
Sec14-1	549.907	327.307	0.620074	G.inflata
Sec14-3	552.167	328.663	0.613819	G.inflata
Sec14-5	554.427	330.018	0.518189	G.inflata
Sec14-7	556.687	331.373	0.789297	G.inflata
Sec14-9	558.947	332.731	0.855333	G.inflata
Sec14-11	561.211	334.095	0.688466	G.inflata
Sec14-13	563.486	335.46	1.05398	G.inflata
Sec14-15	565.761	336.824	0.78993	G.inflata
Sec14-17	568.036	338.192	0.994324	G.inflata
Sec14-19	570.317	339.571	1.63848	G.inflata
Sec14-21	572.617	341	1.70802	G.inflata
Sec14-23	574.917	342.201	2.14755	G.inflata
Sec14-25	577.217	343.447	1.57311	G.inflata
Sec14-27	579.517	344.686	1.82302	G.inflata
Sec14-29	581.805	345.905	1.49157	G.inflata
Sec14-31	584.055	347.124	1.67373	G.inflata
Sec14-33	586.305	348.342	1.45216	G.inflata
Sec14-35	588.555	349.562	1.43231	G.inflata
Sec14-37	590.807	350.787	1.3469	G.inflata
Sec14-39	593.067	352.011	2.06033	G.inflata
Sec14-41	595.327	353.235	1.25652	G.inflata
Sec14-43	597.587	354.459	1.48473	G.inflata
Sec14-45	599.847	355.685	1.54842	G.inflata
Sec14-47	602.111	356.918	1.53416	G.inflata
Sec14-49	604.386	358.15	1.56163	G.inflata
Sec14-51	606.661	359.382	1.47166	G.inflata
Sec14-53	608.936	360.611	1.37365	G.inflata
Sec14-55	611.205	361.83	1.73407	G.inflata
Sec14-57	613.455	363.049	1.47869	G.inflata
Sec14-59	615.705	364.267	1.53181	G.inflata
Sec14-61	617.955	365.498	1.42803	G.inflata
Sec14-63	620.227	366.766	1.3327	G.inflata
Sec14-65	622.567	368.033	1.37732	G.inflata
Sec14-67	624.907	369.301	1.07631	G.inflata
Sec14-69	627.247	370.568	1.08631	G.inflata
Sec14-71	629.587	371.817	1.35174	G.inflata
Sec14-73	631.892	373.008	1.02023	G.inflata
Sec14-75	634.092	374.2	1.12328	G.inflata
Sec14-77	636.292	375.392	0.897107	G.inflata
Sec14-79	638.492	376.678	0.931706	G.inflata
Sec14-81	640.867	378.249	0.693101	G.inflata
Sec14-83	643.767	379.82	1.38549	G.inflata
Sec14-85	646.667	380	0.925724	G.inflata

## Sheet: C14 dating
Description	LabID	Sample Depth(cm)	Test Species	AMS14C age (with uncertainty)	Reservoir Age (with uncertainty)	△R	Calibrated Age Range (.B.P.yr) (1σ)	Calibrated Age (.B.P.yr) (1σ)	Calibrated Age Range (.B.P.yr) (2σ)	Calibrated Age(.B.P.yr) (2σ)
14C age	Beta-522028	1.5	Mixed Foraminifera	3290 +/- 30 BP.yr	439+/- 18	39+/- 18	3014-3136	3075±61	2950-3183	3073±123
14C age	Beta-522029	32.5	Mixed Foraminifera	12500 +/- 40 BP.yr	439+/- 18	39+/- 18	13867-14014	13941±74	13802-14085	13943±141
14C age	Beta-522030	44.5	Mixed Foraminifera	14480 +/- 40 BP.yr	439+/- 18	39+/- 18	16962-17156	17059±97	16811-17276	17057±246
14C age	Beta-522031	62.5	Mixed Foraminifera	23200 +/- 80 BP.yr	439+/- 18	39+/- 18	27024-27279	27152±128	26801-27392	27140±339

## Sheet: TOC TN C13
Sample	Depth (cm)	Age(kyr)	TOC（%）	TN（%）	δ13C(‰)
Set8-1	0.53	1.01793	0.231991	0.0483814	-23.6771
Set8-3	2.65	3.43885	0.424085	0.0882331	-22.7714
Set8-5	4.77	4.17753	0.212929	0.0427254	-22.9368
Set8-7	6.89	4.91621	0.238981	0.0542922	-23.04
Set8-9	9.01	5.65488	0.189739	0.0387434	-22.5671
Sec9-1	11.365	6.47544	0.181247	0.0402246	-22.7415
Sec9-3	13.625	7.2629	0.170729	0.0403261	-22.6404
Sec9-5	15.885	8.05035	0.167567	0.0360774	-22.4397
Sec9-7	18.145	8.83781	0.204049	0.038635	-22.5061
Sec9-9	20.405	9.62526	0.157286	0.0329566	-22.5455
Sec9-11	22.6625	10.4119	0.165422	0.0352819	-22.3506
Sec9-13	24.9125	11.1958	0.163501	0.0360513	-22.4959
Sec9-15	27.1625	11.9798	0.179148	0.0370444	-22.8892
Sec9-17	29.4125	12.7638	0.187396	0.0386949	-22.9847
Sec9-19	31.6812	13.5543	0.169536	0.0342896	-22.581
Sec9-21	33.9425	14.2548	0.27047	0.0405712	-21.8993
Sec9-23	36.1825	14.8721	0.313562	0.0431016	-21.8622
Sec9-25	38.4225	15.4894	0.335193	0.0458125	-21.6896
Sec9-27	40.6625	16.1067	0.380447	0.0482603	-21.8048
Sec9-29	42.9237	16.7299	0.44337	0.0533264	-21.4891
Sec9-31	45.2488	17.6831	0.393547	0.04649	-21.3103
Sec9-33	47.5737	18.9503	0.383022	0.0496148	-21.1262
Sec9-35	49.8987	20.2175	0.396214	0.0492995	-21.3735
Sec9-37	52.2175	21.4813	0.400728	0.0660783	-21.2635
Sec9-39	54.5175	22.7348	0.355207	0.0481761	-21.2613
Sec9-41	56.8175	23.9884	0.348222	0.0476931	-21.285
Sec9-43	59.1175	25.2419	0.365291	0.0493164	-21.2973
Sec9-45	61.4175	26.4955	0.32908	0.0457109	-21.3475
Sec9-47	63.6987	27.9915	0.294416	0.0429468	-21.0374
Sec9-49	65.9237	29.7159	0.329038	0.0468854	-21.2313
Sec9-51	68.1488	31.4403	0.330525	0.0463098	-21.2464
Sec9-53	70.3737	33.1647	0.323245	0.0455226	-21.3595
Sec9-55	72.6112	34.8987	0.290116	0.0420396	-21.5997
Sec9-57	74.8863	36.6618	0.356849	0.0531091	-21.7304
Sec9-59	77.1612	38.425	0.363751	0.0507791	-21.3844
Sec9-61	79.4363	40.1881	0.315335	0.0462069	-21.4164
Sec9-63	81.6975	41.9406	0.267363	0.0453279	-21.8475
Sec9-65	83.9175	43.6611	0.303516	0.0492293	-21.6972
Sec9-67	86.1375	45.3816	0.308223	0.0492972	-21.4278
Sec9-69	88.3575	47.1021	0.279416	0.0480753	-21.6388
Sec9-71	90.5775	48.8226	0.232608	0.0461679	-21.9381
Sec9-73	92.8238	50.5634	0.22619	0.0443471	-21.8946
Sec9-75	95.1488	52.3653	0.251049	0.0483616	-21.7878
Sec9-77	97.4737	54.1672	0.276572	0.0562075	-21.6193
Sec9-79	99.7987	55.969	0.320568	0.052865	-21.7818
Sec9-81	102.192	57.8242	0.324103	0.0562743	-21.3514
Sec9-83	104.793	59.8392	0.318112	0.0534542	-21.8102
Sec9-85	107.392	60	0.285539	0.0556178	-21.6895
Sec10-1	109.903	61.608	0.283433	0.0480265	-22.005
Sec10-3	112.142	63.295	0.255942	0.047693	-22.0587
Sec10-5	114.382	64.8005	0.238054	0.0439144	-21.883
Sec10-7	116.623	66.306	0.252986	0.0484499	-22.0638
Sec10-9	118.862	67.8116	0.229833	0.0479168	-22.6144
Sec10-11	121.13	69.3171	0.254475	0.0490517	-22.4152
Sec10-13	123.48	70.8411	0.192231	0.0432816	-22.5458
Sec10-15	125.83	72.4205	0.16622	0.039447	-22.6278
Sec10-17	128.18	74	0.126823	0.0330674	-22.7918
Sec10-19	130.512	75.3103	0.135511	0.03659	-23.2128
Sec10-21	132.792	76.6109	0.129236	0.0350397	-22.8191
Sec10-23	135.072	77.8823	0.175015	0.0404428	-22.7897
Sec10-25	137.352	79.1536	0.138437	0.0339661	-22.6126
Sec10-27	139.632	80.4249	0.138171	0.0310037	-22.2482
Sec10-29	141.905	81.6962	0.180161	0.0369337	-22.2468
Sec10-31	144.155	82.9633	0.166569	0.0360246	-22.3147
Sec10-33	146.405	84.2179	0.160829	0.0355373	-22.4563
Sec10-35	148.655	85.4725	0.188356	0.0313493	-22.0716
Sec10-37	150.917	86.7271	0.16112	0.0337092	-21.9665
Sec10-39	153.218	87.9887	0.140171	0.0215005	-21.9626
Sec10-41	155.52	89.2711	0.0617824	0.0177785	-22.4403
Sec10-43	157.817	91.8361	/	/	/
Sec10-45	160.132	93.1269	0.186279	0.0426383	-22.7163
Sec10-47	162.493	94.4428	0.156637	0.0357336	-22.6278
Sec10-49	164.852	95.7588	0.109223	0.0272524	-22.5912
Sec10-51	167.213	97.0747	0.126636	0.0343082	-22.7418
Sec10-53	169.572	98.3906	0.132403	0.0393375	-23.0758
Sec10-55	171.911	99.6947	/	/	/
Sec10-57	174.19	104.761	/	/	/
Sec10-59	176.46	105.999	/	/	/
Sec10-61	178.74	107.237	/	/	/
Sec10-63	180.998	108.475	0.0711255	0.0272591	-23.9528
Sec10-65	183.218	109.713	0.0939944	0.0216906	-23.2229
Sec10-67	185.438	110.958	0.119526	0.0280417	-22.8433
Sec10-69	187.657	112.227	0.137277	0.0344156	-22.5715
Sec10-71	189.877	113.495	0.139186	0.0351357	-22.6288
Sec10-73	192.111	114.764	0.130085	0.0405188	-22.6787
Sec10-75	194.386	114.799	0.124663	0.037406	-22.6013
Sec10-77	196.661	116.018	0.130537	0.0360291	-22.859
Sec10-79	198.936	117.231	0.13786	0.0353254	-22.8951
Sec10-81	201.186	118.444	0.146968	0.0400817	-22.9894
Sec10-83	203.361	119.657	0.197583	0.0398138	-22.7016
Sec10-85	205.536	120.895	0.137436	0.0339334	-22.9076
Sec10-87	207.711	122.211	0.118552	0.0375169	-23.1714
Sec10D-1	209.933	123.527	0.0910033	0.0374958	-23.6151
Sec10D-3	212.292	124.843	0.108374	0.0342198	-23.2646
Sec10D-5	214.653	126.159	0.102684	0.0370077	-23.3113
Sec10D-7	217.012	127.463	0.105405	0.0374577	-23.49
Sec10D-9	219.373	128.731	0.107284	0.0373716	-23.4941
Sec10D-11	221.711	130	0.0927149	0.0318511	-23.3705
Sec10D-13	223.986	131.236	0.115096	0.0404046	-23.4891
Sec10D-15	226.261	132.474	0.129227	0.0409605	-23.4887
Sec10D-17	228.536	133.713	0.122007	0.0415724	-23.2667
Sec10D-19	230.812	134.952	0.15153	0.0407193	-23.1772
Sec10D-21	233.093	136.191	0.219798	0.0453417	-22.5414
Sec10D-23	235.373	136.38	0.187982	0.0339678	-22.1513
Sec10D-25	237.653	137.43	0.196823	0.0289445	-22.2608
Sec10D-27	239.933	138.64	0.247532	0.0461779	-22.589
Sec10D-29	242.159	139.763	0.253614	0.0464405	-22.6136
Sec10D-31	244.226	140.887	0.250238	0.0492398	-22.6365
Sec10D-33	246.292	142.036	0.289656	0.0431877	-22.3563
Sec11-1	248.407	143.264	0.322157	0.0495627	-23.2223
Sec11-3	250.667	144.493	0.30674	0.0479775	-22.7955
Sec11-5	252.928	145.721	0.322136	0.0544198	-22.7793
Sec11-7	255.188	146.949	0.23545	0.0466991	-22.7353
Sec11-9	257.447	148.179	0.316634	0.0609615	-22.8556
Sec11-11	259.711	149.416	0.228713	0.0476141	-22.9532
Sec11-13	261.986	150.652	0.290095	0.0570307	-22.7652
Sec11-15	264.261	151.889	0.257773	0.0495773	-22.637
Sec11-17	266.536	153.123	0.28696	0.0534885	-22.8112
Sec11-19	268.808	154.351	0.215006	0.0385373	-22.8376
Sec11-21	271.067	155.579	0.222153	0.0459576	-21.4289
Sec11-23	273.327	156.808	0.201591	0.0393757	-21.6581
Sec11-25	275.587	158.036	0.216719	0.0429949	-21.4458
Sec11-27	277.848	159.27	0.242886	0.045349	-21.4563
Sec11-29	280.118	160.52	0.330184	0.0545632	-21.4279
Sec11-31	282.418	161.77	0.175377	0.0337759	-22.2512
Sec11-33	284.717	163.02	0.276451	0.0495658	-21.9709
Sec11-35	287.017	164.276	0.266966	0.0515827	-21.8923
Sec11-37	289.33	165.554	0.309737	0.0483112	-22.0319
Sec11-39	291.68	166.831	0.336712	0.0643941	-22.4617
Sec11-41	294.03	168.108	0.279216	0.0475102	-22.307
Sec11-43	296.38	169.37	0.256415	0.0506338	-22.2755
Sec11-45	298.702	170.588	0.24872	0.0498477	-22.2325
Sec11-47	300.942	171.805	0.249526	0.0505914	-22.1876
Sec11-49	303.182	173.022	0.241471	0.0482847	-22.1183
Sec11-51	305.423	174.24	0.221708	0.0446618	-22.1776
Sec11-53	307.663	175.459	0.214972	0.041877	-22.0654
Sec11-55	309.905	176.681	0.250137	0.0442282	-21.5672
Sec11-57	312.155	177.904	0.207047	0.0451892	-21.6153
Sec11-59	314.405	179.127	0.258559	0.047924	-20.8631
Sec11-61	316.655	180.351	0.261694	0.0451102	-21.1219
Sec11-63	318.908	185	0.279143	0.0479542	-21.1047
Sec11-65	321.168	186.772	0.304133	0.04609	-21.4593
Sec11-67	323.428	188.422	0.307585	0.0569855	-21.7568
Sec11-69	325.687	190.071	0.2409	0.0571842	-21.8107
Sec11-71	327.947	191.728	0.224905	0.0517513	-21.9374
Sec11-73	330.217	193.407	0.227863	0.0460015	-22.2617
Sec11-75	332.517	195.086	0.184646	0.0412266	-22.3289
Sec11-77	334.817	196.765	0.309225	0.0599778	-22.03
Sec11-79	337.117	198.48	0.163652	0.0469526	-22.8715
Sec11-81	339.467	200.305	0.155959	0.0477052	-22.8899
Sec11-83	341.967	202.13	0.250915	0.0624788	-22.6456
Sec11-85	344.467	203.954	0.147588	0.049708	-22.9483
Sec11-87	346.967	205.739	0.134195	0.0393446	-22.8366
Sec12-1	349.412	207.403	0.154959	0.0431778	-23.5118
Sec12-3	351.692	209.068	0.156021	0.0515844	-23.2825
Sec12-5	353.972	210.732	0.157321	0.04477	-22.6918
Sec12-7	356.252	212.396	0.165367	0.0437908	-22.8849
Sec12-9	358.532	214.064	0.138969	0.0432809	-22.8474
Sec12-11	360.817	215.743	0.119333	0.0378156	-23.0934
Sec12-13	363.117	217.422	0.131139	0.0371483	-22.8719
Sec12-15	365.417	219.1	0.104175	0.0386455	-22.9527
Sec12-17	367.717	220.772	0.121904	0.0379463	-22.8802
Sec12-19	370.007	222.422	0.142077	0.0442968	-23.3582
Sec12-21	372.267	224.071	0.14019	0.045698	-22.8486
Sec12-23	374.527	225.721	0.147112	0.0504289	-22.922
Sec12-25	376.787	227.37	0.148896	0.0505193	-23.1236
Sec12-27	379.047	229.027	0.147333	0.0463507	-22.7966
Sec12-29	381.317	230.706	0.175772	0.0518399	-23.2019
Sec12-31	383.617	232.385	0.318138	0.0622308	-22.8066
Sec12-33	385.917	234.064	0.309434	0.0557185	-21.6398
Sec12-35	388.217	235.734	0.262822	0.0506793	-21.9014
Sec12-37	390.505	237.376	0.18873	0.0465317	-22.5154
Sec12-39	392.755	239.018	0.172067	0.0456486	-23.2325
Sec12-41	395.005	240.661	0.209374	0.044466	-22.3982
Sec12-43	397.255	242.308	0.169872	0.0483909	-23.3541
Sec12-45	399.512	243.973	0.134049	0.0381646	-23.3193
Sec12-47	401.792	245.637	0.128342	0.033703	-23.5066
Sec12-49	404.072	247.301	0.140657	0.0457852	-23.4471
Sec12-51	406.352	248.965	0.150545	0.0397038	-24.206
Sec12-53	408.632	250.642	0.102584	0.0340998	-24.0564
Sec12-55	410.93	252	0.130217	0.0404688	-23.8991
Sec12-57	413.28	253.296	0.136229	0.0310966	-24.1366
Sec12-59	415.63	254.453	0.241137	0.050875	-22.5756
Sec12-61	417.98	255.597	0.267293	0.0449922	-22.1785
Sec12-63	420.302	256.701	0.319379	0.0462235	-21.9171
Sec12-65	422.542	257.804	0.383165	0.0594163	-21.9608
Sec12-67	424.782	258.908	0.377507	0.0574636	-21.926
Sec12-69	427.022	260.011	0.369952	0.0577334	-22.1853
Sec12-71	429.262	261.125	0.329659	0.0506929	-22.3587
Sec12-73	431.524	262.27	0.294943	0.047512	-22.5832
Sec12-75	433.849	263.416	0.270074	0.0456983	-22.2981
Sec12-77	436.174	264.561	0.313358	0.0501481	-22.3706
Sec12-79	438.499	265.7	0.268686	0.0519811	-22.1466
Sec12-81	440.811	266.821	0.28743	0.0618573	-22.2146
Sec12-83	443.086	267.942	0.333963	0.059017	-22.0009
Sec12-85	445.361	269.062	0.355203	0.056451	-21.9659
Sec12-87	447.636	270.181	0.341842	0.0529049	-22.1837
Sec13-1	449.907	271.294	0.338743	0.0496763	-22.1217
Sec13-3	452.167	272.408	0.327624	0.0530321	-22.0886
Sec13-5	454.427	273.521	0.297115	0.0542568	-21.9619
Sec13-7	456.687	274.634	0.192032	0.0440218	-22.2123
Sec13-9	458.947	275.746	0.162553	0.0406913	-22.337
Sec13-11	461.205	276.855	0.208337	0.0470044	-22.428
Sec13-13	463.455	277.963	0.188167	0.0556979	-23.4425
Sec13-15	465.705	279.071	0.220708	0.0480843	-22.4901
Sec13-17	467.955	280.181	0.162284	0.0405975	-23.0974
Sec13-19	470.207	281.294	0.158969	0.0407338	-23.4276
Sec13-21	472.467	282.408	0.110042	0.0336383	-24.0057
Sec13-23	474.727	283.521	0.0661278	0.0218044	-24.819
Sec13-25	476.987	284.634	0.109335	0.0336362	-23.4045
Sec13-27	479.247	285.728	0.215203	0.0427715	-23.357
Sec13-29	481.467	286.762	0.117279	0.0249896	-23.2804
Sec13-31	483.567	287.797	0.170574	0.0353928	-23.1359
Sec13-33	485.667	288.831	0.174483	0.0374402	-23.1208
Sec13-35	487.767	290	0.182712	0.0404266	-22.7919
Sec13-37	489.957	291.475	0.183854	0.0401375	-22.9969
Sec13-39	492.417	292.951	0.282747	0.0465996	-22.0802
Sec13-41	494.877	294.426	0.263297	0.0418669	-21.9559
Sec13-43	497.337	295.901	0.269325	0.0419522	-21.6226
Sec13-45	499.797	297.349	0.266265	0.0442322	-21.7527
Sec13-47	502.211	298.713	0.187887	0.0350589	-22.0023
Sec13-49	504.486	300.077	0.214317	0.0423256	-22.0239
Sec13-51	506.761	301.442	0.207185	0.0438851	-22.2498
Sec13-53	509.036	302.813	0.238677	0.0402169	-22.9438
Sec13-55	511.324	304.208	0.157785	0.0294388	-22.6589
Sec13-57	513.649	305.602	0.125591	0.0198355	-23.312
Sec13-59	515.974	306.996	0.265306	0.0649054	-23.1964
Sec13-61	518.299	308.381	0.176783	0.0381679	-22.9263
Sec13-63	520.607	309.736	0.177401	0.0371459	-22.7049
Sec13-65	522.867	311.091	0.181583	0.0383231	-23.0899
Sec13-67	525.127	312.447	0.16181	0.0383558	-23.0579
Sec13-69	527.387	313.802	0.164325	0.0386252	-23.0266
Sec13-71	529.647	315.16	0.198279	0.0449485	-22.8099
Sec13-73	531.911	316.524	0.147722	0.0412258	-23.1359
Sec13-75	534.186	317.888	0.148916	0.0384984	-23.0148
Sec13-77	536.461	319.253	0.137217	0.038493	-23.3265
Sec13-79	538.736	320.609	0.151525	0.0413718	-23.2012
Sec13-81	540.999	321.944	0.127115	0.0327567	-23.3591
Sec13-83	543.224	323.278	0.140478	0.0322035	-23.6428
Sec13-85	545.449	324.612	0.15637	0.0326729	-23.1124
Sec13-87	547.674	325.952	0.122489	0.0302166	-24.557
Sec14-1	549.907	327.307	0.120856	0.0309821	-24.8758
Sec14-3	552.167	328.663	0.102636	0.0331245	-24.334
Sec14-5	554.427	330.018	0.121269	0.0394874	-24.4229
Sec14-7	556.687	331.373	0.139857	0.0399507	-23.9318
Sec14-9	558.947	332.731	0.140355	0.0426547	-24.0965
Sec14-11	561.211	334.095	0.126331	0.0391613	-23.7798
Sec14-13	563.486	335.46	0.166384	0.0421134	-23.4249
Sec14-15	565.761	336.824	0.194305	0.0439881	-23.2042
Sec14-17	568.036	338.192	0.36196	0.0558935	-22.7287
Sec14-19	570.317	339.571	0.317796	0.048327	-22.5875
Sec14-21	572.617	341	0.357104	0.0553795	-22.4846
Sec14-23	574.917	342.201	0.338544	0.0516774	-22.5253
Sec14-25	577.217	343.447	0.338231	0.0549376	-22.5594
Sec14-27	579.517	344.686	0.296333	0.0480735	-22.6763
Sec14-29	581.805	345.905	0.274767	0.0494866	-22.5836
Sec14-31	584.055	347.124	0.227969	0.0533251	-22.7437
Sec14-33	586.305	348.342	0.21561	0.0434528	-22.8092
Sec14-35	588.555	349.562	0.209365	0.044653	-22.7034
Sec14-37	590.807	350.787	0.21764	0.0463413	-22.9953
Sec14-39	593.067	352.011	0.192783	0.0454675	-22.954
Sec14-41	595.327	353.235	0.199458	0.0503944	-22.9467
Sec14-43	597.587	354.459	0.196063	0.0480054	-22.7917
Sec14-45	599.847	355.685	0.191339	0.048315	-22.618
Sec14-47	602.111	356.918	0.195789	0.0481183	-22.582
Sec14-49	604.386	358.15	0.230227	0.0488228	-22.1674
Sec14-51	606.661	359.382	0.253123	0.0459645	-22.1865
Sec14-53	608.936	360.611	0.230156	0.0472121	-22.2236
Sec14-55	611.205	361.83	0.204503	0.0493724	-22.3452
Sec14-57	613.455	363.049	0.215926	0.0516355	-22.1324
Sec14-59	615.705	364.267	0.167549	0.0379485	-22.8266
Sec14-61	617.955	365.498	0.121344	0.0317505	-22.9299
Sec14-63	620.227	366.766	0.216119	0.0462987	-22.3189
Sec14-65	622.567	368.033	0.202227	0.0484899	-22.389
Sec14-67	624.907	369.301	0.181428	0.0499744	-22.8466
Sec14-69	627.247	370.568	0.18146	0.0405075	-22.5069
Sec14-71	629.587	371.817	0.187347	0.0376159	-22.563
Sec14-73	631.892	373.008	0.159639	0.0309294	-22.2526
Sec14-75	634.092	374.2	0.157433	0.029339	-22.1856
Sec14-77	636.292	375.392	0.137774	0.0296804	-22.3803
Sec14-79	638.492	376.678	0.176917	0.0319205	-21.8765
Sec14-81	640.867	378.249	0.158321	0.0310327	-22.3595
Sec14-83	643.767	379.82	0.154063	0.0313982	-22.7127
Sec14-85	646.667	380

## Sheet: grain size
Sample	Depth (cm)	Age(kyr)	Md(μm)	Sand(%)	Silt(%)	Clay(%)	EM 1(%)	EM 2(%)	EM 3(%)
Set8-1	0.53	1.01793	14.496	20.43	61.76	17.7906	40.22	32.77	27
Set8-3	2.65	3.43885	13.417	18.263	63.69	18.0306	42.1	34.81	23.09
Set8-5	4.77	4.17753	13.472	18.393	63.14	18.4707	42.01	33.93	24.05
Set8-7	6.89	4.91621	13.352	18.56	62.79	18.6806	42.91	32.37	24.73
Set8-9	9.01	5.65488	13.624	18.711	63.08	18.2006	42	33.39	24.61
Sec9-1	11.365	6.47544	14.57	19.71	62.3	17.9706	39.56	34.03	26.41
Sec9-3	13.625	7.2629	14.408	19.062	63.42	17.5306	39.35	36.1	24.55
Sec9-5	15.885	8.05035	14.982	20.572	61.72	17.7206	39.15	33.22	27.63
Sec9-7	18.145	8.83781	14.78	19.522	62.78	17.7106	38.92	35.1	25.98
Sec9-9	20.405	9.62526	18.223	23.422	60.76	15.8205	33.55	34.89	31.56
Sec9-11	22.6625	10.4119	16.51	22.522	60.11	17.3506	36.92	32.05	31.03
Sec9-13	24.9125	11.1958	16.813	22.811	59.98	17.2006	36.67	31.5	31.83
Sec9-15	27.1625	11.9798	13.367	18.53	62.11	19.3807	41.99	33.06	24.95
Sec9-17	29.4125	12.7638	14.703	20.433	61.07	18.4907	39.9	32.44	27.66
Sec9-19	31.6812	13.5543	15.694	16.313	67.4	16.2905	32.37	48.29	19.34
Sec9-21	33.9425	14.2548	11.777	11.06	68.99	19.9407	43.46	44.99	11.55
Sec9-23	36.1825	14.8721	10.111	10.101	67.81	22.0909	51.87	37.58	10.55
Sec9-25	38.4225	15.4894	9.23	8.22	68.68	23.1309	56.93	35.75	7.32
Sec9-27	40.6625	16.1067	10.142	12.07	66.51	21.4109	54.05	34.27	11.68
Sec9-29	42.9237	16.7299	8.728	10.94	63.91	25.151	61.84	24.27	13.89
Sec9-31	45.2488	17.6831	9.644	12.6407	64.49	22.8608	57.29	28.06	14.65
Sec9-33	47.5737	18.9503	11.309	15.201	64.69	20.1207	49.68	32.87	17.44
Sec9-35	49.8987	20.2175	10.701	13.1503	66.45	20.3906	51.64	34.67	13.69
Sec9-37	52.2175	21.4813	9.98	15.392	62.72	21.8807	57.6	23.82	18.58
Sec9-39	54.5175	22.7348	9.359	17.7108	57.93	25.0207	60.62	13.52	25.86
Sec9-41	56.8175	23.9884	9.692	17.122	55.62	26.3708	58.82	12.64	28.55
Sec9-43	59.1175	25.2419	7.849	12.8104	59.27	27.5406	68.69	10.14	21.16
Sec9-45	61.4175	26.4955	10.219	10.512	56.58	24.9806	57.31	14.84	27.85
Sec9-47	63.6987	27.9915	14.941	8.55	50.91	21.7206	49.91	9.93	40.16
Sec9-49	65.9237	29.7159	5.158	8.1703	61.24	38.7703	95.35	0	4.65
Sec9-51	68.1488	31.4403	9.296	8.19	57.36	25.2506	61.81	12.08	26.11
Sec9-53	70.3737	33.1647	213.16	13.11	19.09	10.111	35.73	0	64.27
Sec9-55	72.6112	34.8987	10.11	15.99	54.36	24.6907	60.03	7.68	32.28
Sec9-57	74.8863	36.6618	8.232	18.1103	60.51	25.8607	68.23	13.64	18.13
Sec9-59	77.1612	38.425	8.074	24.27	61.73	25.3707	69.6	13.23	17.17
Sec9-61	79.4363	40.1881	8.854	19.081	61.7	23.3306	65.88	15.69	18.43
Sec9-63	81.6975	41.9406	8.39	27.91	60.77	26.3008	64.35	15.87	19.78
Sec9-65	83.9175	43.6611	8.681	0	62.11	23.1906	67.7	15.52	16.78
Sec9-67	86.1375	45.3816	8.226	29.6	67.13	23.9903	67.41	23.1	9.49
Sec9-69	88.3575	47.1021	7.705	34.911	66.51	25.5504	71.43	19.26	9.32
Sec9-71	90.5775	48.8226	7.519	15.3203	64.44	26.4705	73.72	14.91	11.37
Sec9-73	92.8238	50.5634	7.095	3.562	65	27.7905	77.35	13.79	8.86
Sec9-75	95.1488	52.3653	8.251	48.89	70.51	23.7905	66.01	31.4	2.59
Sec9-77	97.4737	54.1672	7.536	49.991	62.13	27.2506	72.9	12.41	14.69
Sec9-79	99.7987	55.969	6.683	55.0608	62.83	30.0807	78.54	9.32	12.14
Sec9-81	102.192	57.8242	7.685	65.09	66.77	25.6506	71.79	20.44	7.77
Sec9-83	104.793	59.8392	8.075	41.483	60.78	26.2808	68.3	13.01	18.69
Sec9-85	107.392	60	8.901	25.1801	55.97	26.7107	63.7	9.59	26.71
Sec10-1	109.903	61.608	10.652	48.1205	60.04	22.2507	55.48	20.7	23.82
Sec10-3	112.142	63.295	10.585	45.1804	61.93	20.9406	56.05	23.09	20.86
Sec10-5	114.382	64.8005	10.374	45.931	63.2	23.9908	52.11	29.91	17.97
Sec10-7	116.623	66.306	7.952	52	63.69	25.8108	68.66	17.34	14
Sec10-9	118.862	67.8116	8.151	53.4	66.19	25.2409	66.39	24.05	9.56
Sec10-11	121.13	69.3171	7.324	53.212	64.58	27.2309	74.28	15.21	10.51
Sec10-13	123.48	70.8411	6.987	47.8506	62.77	29.0509	75.59	11.51	12.9
Sec10-15	125.83	72.4205	8.516	67.7507	60.63	26.2807	64.15	16.5	19.35
Sec10-17	128.18	74	9.844	44.5601	60.32	23.6907	58.01	19.64	22.35
Sec10-19	130.512	75.3103	10.934	36.4601	59.91	21.9906	54.78	21.07	24.15
Sec10-21	132.792	76.6109	12.549	56.34	54.88	20.8406	54.06	12.26	33.69
Sec10-23	135.072	77.8823	10.743	16.75	60.64	20.3104	57.19	18.89	23.91
Sec10-25	137.352	79.1536	14.533	17.7107	55.76	16.3503	49.97	14.68	35.36
Sec10-27	139.632	80.4249	5.506	15.381	65.0503	34.942	100	0	0
Sec10-29	141.905	81.6962	16.561	14.112	50.83	19.5604	48.85	9.26	41.9
Sec10-31	144.155	82.9633	22.535	10.18	49.84	15.2603	42.56	10.46	46.98
Sec10-33	146.405	84.2179	9.731	11.0109	62.03	22.6504	58.19	18.35	23.46
Sec10-35	148.655	85.4725	10.133	9.99	72.76	23.6906	44.76	45.25	9.99
Sec10-37	150.917	86.7271	60.397	11.8507	40.81	10.301	24.95	5.7	69.34
Sec10-39	153.218	87.9887	62.991	16.003	41.22	8.781	20.78	7.42	71.8
Sec10-41	155.52	89.2711	74.549	13.672	39.2	5.73	16.33	7.61	76.06
Sec10-43	157.817	91.8361	127.63	13.501	32.37	2.5401	15.4	5.38	79.21
Sec10-45	160.132	93.1269	43.709	15.321	46.49	12.0408	26.08	13.68	60.25
Sec10-47	162.493	94.4428	14.724	16.6708	58.01	16.8203	42.38	31.39	26.23
Sec10-49	164.852	95.7588	59.311	15.683	44.43	7.4507	15.17	16.61	68.22
Sec10-51	167.213	97.0747	54.017	16.481	48.14	6.66	11.56	25.03	63.41
Sec10-53	169.572	98.3906	55.855	13.741	48.04	6.03	6.55	28.48	64.97
Sec10-55	171.911	99.6947	66.684	14.0205	45.52	2.5006	0	28.37	71.63
Sec10-57	174.19	104.761	70.222	16.3904	44.09	2.4805	1.13	26.16	72.71
Sec10-59	176.46	105.999	69.774	19.991	44.57	2.2105	0.41	27.76	71.83
Sec10-61	178.74	107.237	58.821	20.3805	49.64	2.4805	0	36.86	63.14
Sec10-63	180.998	108.475	203.06	24.862	28.9	3.3302	26.22	0	73.78
Sec10-65	183.218	109.713	41.556	26.0506	43.11	12.332	36.89	2.8	60.31
Sec10-67	185.438	110.958	27.06	22.013	49.72	13.802	39.32	11.77	48.91
Sec10-69	187.657	112.227	128.51	29.261	31.21	9.871	43.05	0	56.95
Sec10-71	189.877	113.495	14.243	25.553	66.35	16.9409	39.8	38.41	21.79
Sec10-73	192.111	114.764	14.986	20.612	65.55	16.7309	38.79	38.04	23.17
Sec10-75	194.386	114.799	13.421	20.032	67.21	17.4208	41.57	38.99	19.44
Sec10-77	196.661	116.018	12.347	9.971	68.26	17.6309	44.46	38.74	16.8
Sec10-79	198.936	117.231	10.078	9.281	70.36	19.441	53.78	36.24	9.98
Sec10-81	201.186	118.444	10.5	10.3404	71.04	17.951	51.74	38.72	9.53
Sec10-83	203.361	119.657	9.407	9.02	70.61	19.4103	58.92	31.9	9.18
Sec10-85	205.536	120.895	11.278	10.0406	70.76	17.3909	47.59	40.47	11.95
Sec10-87	207.711	122.211	12.802	14.312	67.91	16.1009	43.78	37.95	18.27
Sec10D-1	209.933	123.527	14.77	14.67	74.19	12.112	30.91	59.56	9.52
Sec10D-3	212.292	124.843	15.066	25.433	73.77	12.742	30.17	60.34	9.49
Sec10D-5	214.653	126.159	15.164	21.1908	71.87	12.802	31.83	55.12	13.05
Sec10D-7	217.012	127.463	14.481	21.31	69.09	14.2609	36.62	46.42	16.96
Sec10D-9	219.373	128.731	15.045	26.141	71.86	12.482	32.58	54.23	13.18
Sec10D-11	221.711	130	15.023	24.5603	70.81	12.722	33.67	51.53	14.8
Sec10D-13	223.986	131.236	15.805	33.3004	74.29	11.982	28.23	62.69	9.08
Sec10D-15	226.261	132.474	16.38	46.241	74.4	11.562	26.54	63.76	9.69
Sec10D-17	228.536	133.713	15.827	28.3904	71.32	12.272	31.39	54.27	14.34
Sec10D-19	230.812	134.952	19.822	5.501	69.76	10.261	21.6	58.57	19.82
Sec10D-21	233.093	136.191	16.179	6.1605	65.18	14.4109	35.95	40.18	23.87
Sec10D-23	235.373	136.38	20.624	10.462	61.95	13.232	29.55	38.88	31.57
Sec10D-25	237.653	137.43	23.121	6.43	62.65	11.341	25.25	41.81	32.94
Sec10D-27	239.933	138.64	16.088	6.312	65.39	12.622	37.25	40.72	22.03
Sec10D-29	242.159	139.763	18.878	6.6203	55.21	15.5303	42.58	19.78	37.63
Sec10D-31	244.226	140.887	16.06	5.9107	58.76	15.6803	43.72	25.08	31.2
Sec10D-33	246.292	142.036	14.33	8.97	63	16.3904	43.14	32.63	24.24
Sec11-1	248.407	143.264	12.642	13.73	61.97	18.0204	48.99	26.31	24.7
Sec11-3	250.667	144.493	9.384	9.531	68.97	21.0405	58.94	31.83	9.23
Sec11-5	252.928	145.721	10.371	13.82	71.99	18.7003	52.88	42.66	4.46
Sec11-7	255.188	146.949	10.293	9.011	70.52	19.131	53.88	38.6	7.52
Sec11-9	257.447	148.179	10.487	18.5804	72.71	18.271	51.89	43.78	4.33
Sec11-11	259.711	149.416	10.524	21.171	71.09	18.8803	51.92	40.85	7.23
Sec11-13	261.986	150.652	10.406	10.7207	66.31	19.3703	55.68	29.42	14.9
Sec11-15	264.261	151.889	10.489	11.34	65.93	19.3904	55.13	28.98	15.89
Sec11-17	266.536	153.123	25.077	9.512	64	10.561	21.68	47.29	31.04
Sec11-19	268.808	154.351	18.621	8.6904	65.99	12.802	30.82	46.11	23.07
Sec11-21	271.067	155.579	13.225	12.2109	62.46	16.2609	47.66	26.99	25.36
Sec11-23	273.327	156.808	17.002	12.0506	61.96	11.892	40.45	31.49	28.06
Sec11-25	275.587	158.036	13.888	11.071	62.52	12.912	48.77	27.5	23.72
Sec11-27	277.848	159.27	20.05	10.5307	55.39	11.331	44.36	19.99	35.65
Sec11-29	280.118	160.52	45.235	11.8	46.2	7.5309	38.23	12.11	49.66
Sec11-31	282.418	161.77	16.815	10.9006	58.5	13.1109	45.98	25.53	28.49
Sec11-33	284.717	163.02	11.268	14.111	79.99	14.5109	42.9	57.1	0
Sec11-35	287.017	164.276	10.941	8.881	78.52	15.3203	45.3	54.7	0
Sec11-37	289.33	165.554	10.882	15.0104	73.14	16.4104	50.34	44.42	5.24
Sec11-39	291.68	166.831	9.363	15.182	73.84	19.7405	57.49	40.74	1.77
Sec11-41	294.03	168.108	10.231	13.4	75.81	17.8204	50.27	47.82	1.91
Sec11-43	296.38	169.37	9.569	10.9106	74.51	18.8304	56.03	42.31	1.66
Sec11-45	298.702	170.588	12.759	12.4506	80.75	13.3309	34.38	65.62	0
Sec11-47	300.942	171.805	13.84	6.7304	79.16	11.852	31.52	64.51	3.97
Sec11-49	303.182	173.022	18.203	11.042	76.81	9.461	19.4	68.54	12.06
Sec11-51	305.423	174.24	18.859	14.151	81.16	9.301	14.69	79.98	5.33
Sec11-53	307.663	175.459	18.981	12.911	77.31	8.841	17.4	70.94	11.66
Sec11-55	309.905	176.681	12.665	26.7305	78.64	12.382	37.36	61.4	1.24
Sec11-57	312.155	177.904	14.356	21.9	68.76	12.712	39.23	43.96	16.8
Sec11-59	314.405	179.127	17.495	16.523	67.56	11.301	32.91	43.75	23.34
Sec11-61	316.655	180.351	11.976	13.692	75.65	13.6509	42.34	52.45	5.2
Sec11-63	318.908	185	12.39	12.013	75.7	12.992	40.58	53.04	6.38
Sec11-65	321.168	186.772	11.547	13.761	75.02	15.4903	44.26	50.37	5.37
Sec11-67	323.428	188.422	11.58	14.64	77.73	13.5708	42.98	55.65	1.38
Sec11-69	325.687	190.071	17.725	6.491	78.38	9.411	20.9	69.22	9.88
Sec11-71	327.947	191.728	17.408	8.4601	77.44	10.521	21.85	67.98	10.17
Sec11-73	330.217	193.407	14.582	11.3	76.7	12.222	30.34	61.06	8.6
Sec11-75	332.517	195.086	17.77	12.04	79.34	10.141	18.87	73.66	7.47
Sec11-77	334.817	196.765	14.418	15.062	75.27	12.9308	31.94	58.82	9.24
Sec11-79	337.117	198.48	17.325	16.0606	79.34	9.771	19.74	73.26	7
Sec11-81	339.467	200.305	20.24	13.15	77.16	8.711	14.27	73.42	12.31
Sec11-83	341.967	202.13	14.224	11.51	79.97	11.182	28.98	70.16	0.86
Sec11-85	344.467	203.954	19.161	10.6907	76.5	8.531	15.86	72.85	11.28
Sec11-87	346.967	205.739	19.078	17.6107	75.56	9.281	18.38	68.79	12.82
Sec12-1	349.412	207.403	20.789	23.282	78.53	8.061	11.23	77.95	10.82
Sec12-3	351.692	209.068	17.58	19.6806	79.57	9.561	18.06	76.08	5.86
Sec12-5	353.972	210.732	17.002	26.8505	77.42	10.131	21.56	70.31	8.13
Sec12-7	356.252	212.396	14.219	18.861	81.76	11.521	27.8	72.2	0
Sec12-9	358.532	214.064	15.902	31.9002	77.88	11.052	25.26	70.26	4.48
Sec12-11	360.817	215.743	17.391	14.7504	76.39	9.491	22.48	72.66	4.86
Sec12-13	363.117	217.422	15.086	11.11	76.77	10.331	29.31	68.47	2.22
Sec12-15	365.417	219.1	25.317	12.3	65.7	7.561	19.61	58.01	22.39
Sec12-17	367.717	220.772	22.659	6.44	70.02	7.2009	16.97	70.18	12.86
Sec12-19	370.007	222.422	14.326	4.81006	72.61	10.871	36.58	56.49	6.92
Sec12-21	372.267	224.071	19.962	4.756	77.83	8.471	13.19	75.87	10.94
Sec12-23	374.527	225.721	18.021	6.571	79.11	8.881	16.68	76.65	6.67
Sec12-25	376.787	227.37	20.892	7.931	77.83	8.391	11.45	76.4	12.15
Sec12-27	379.047	229.027	21.64	7.56	76.88	8.471	11.33	74.38	14.29
Sec12-29	381.317	230.706	12.824	6.352	80.77	12.7709	33.87	66.13	0
Sec12-31	383.617	232.385	11.416	7.13	78.03	13.512	43.41	55.82	0.77
Sec12-33	385.917	234.064	16.775	7.042	77.93	10.761	22.87	68.62	8.52
Sec12-35	388.217	235.734	17.19	6.9107	77.6	10.391	22.3	67.82	9.88
Sec12-37	390.505	237.376	20.472	5.96	75.48	9.451	17.02	66.97	16
Sec12-39	392.755	239.018	21.617	10.323	74.9	9.031	14.6	68.1	17.3
Sec12-41	395.005	240.661	21.414	12.693	78.75	8.1009	10.81	77.35	11.85
Sec12-43	397.255	242.308	17.072	11.641	78.77	9.701	20.45	72.51	7.04
Sec12-45	399.512	243.973	17.916	16.4108	79.98	9.311	16.6	77.15	6.25
Sec12-47	401.792	245.637	23.87	30.0703	74.61	7.761	9.28	72.42	18.3
Sec12-49	404.072	247.301	28.614	41.002	70.36	6.3909	6.27	66.17	27.55
Sec12-51	406.352	248.965	24.168	16.7207	72.4	7.931	12.11	66.1	21.8
Sec12-53	408.632	250.642	28.291	14.481	66.89	6.2408	12.08	59.04	28.87
Sec12-55	410.93	252	21.64	15.471	74.05	7.1408	13.79	70.39	15.82
Sec12-57	413.28	253.296	32.635	15.463	62.44	5.6606	13.36	51.14	35.5
Sec12-59	415.63	254.453	18.756	20.192	76.68	8.561	18.8	69.1	12.1
Sec12-61	417.98	255.597	14.069	20.4803	77.97	10.911	32.5	63.22	4.28
Sec12-63	420.302	256.701	16.994	25.5706	77.38	10.331	23.82	67.59	8.59
Sec12-65	422.542	257.804	12.741	27.61	80.4	13.1508	35.1	64.9	0
Sec12-67	424.782	258.908	11.794	30.15	81.1	14.1309	39.05	60.95	0
Sec12-69	427.022	260.011	10.505	17.4804	80.26	14.9909	48.4	51.6	0
Sec12-71	429.262	261.125	11.224	11.5104	79.48	13.9509	43.79	56.21	0
Sec12-73	431.524	262.27	12.441	7.431	79.04	13.0408	37.24	62.08	0.68
Sec12-75	433.849	263.416	13.267	11.6409	80.97	11.472	32.23	67.77	0
Sec12-77	436.174	264.561	10.694	12.1303	78.68	14.971	47.75	52.25	0
Sec12-79	438.499	265.7	12.931	11.7208	80.16	12.7308	34.48	65.52	0
Sec12-81	440.811	266.821	11.838	23.5703	79.07	13.891	40.61	59.39	0
Sec12-83	443.086	267.942	12.052	12.972	79.47	13.6208	39.44	60.56	0
Sec12-85	445.361	269.062	11.067	15.812	78.7	15.321	45.11	54.89	0
Sec12-87	447.636	270.181	12.861	9.572	76.09	13.5809	38.2	56.38	5.43
Sec13-1	449.907	271.294	11.394	6.52	72.05	15.2703	48.33	42.85	8.82
Sec13-3	452.167	272.408	11.503	6.661	71.86	16.5103	46.84	43.97	9.19
Sec13-5	454.427	273.521	14.505	9.8407	70.72	12.882	36.82	47.5	15.69
Sec13-7	456.687	274.634	28.187	15.432	60.58	9.341	22.4	38.87	38.73
Sec13-9	458.947	275.746	42.43	21.652	50.88	8.091	23.86	22.13	54.02
Sec13-11	461.205	276.855	14.309	17.1207	70.69	12.5908	37.82	47.12	15.06
Sec13-13	463.455	277.963	15.229	6.46	72.91	12.6009	33.22	53.1	13.68
Sec13-15	465.705	279.071	14.627	6.631	71.34	13.1709	35.88	48.19	15.93
Sec13-17	467.955	280.181	14.008	6.401	71.32	13.2409	38.41	47.68	13.91
Sec13-19	470.207	281.294	20.153	5.4909	68.77	11.042	26.56	50.57	22.86
Sec13-21	472.467	282.408	15.363	5.241	67.72	11.802	39.31	42.31	18.38
Sec13-23	474.727	283.521	20.288	4.765	64.64	9.761	30.61	43.8	25.59
Sec13-25	476.987	284.634	19.491	9.022	62.18	10.211	36.31	36.87	26.82
Sec13-27	479.247	285.728	17.643	12.143	58.14	11.711	45.38	24.22	30.4
Sec13-29	481.467	286.762	12.716	12.242	68.34	14.121	46.31	40.73	12.96
Sec13-31	483.567	287.797	9.553	12.993	70.24	18.2304	61.38	32.28	6.33
Sec13-33	485.667	288.831	9.988	7.4607	76.49	16.0403	55.49	44.51	0
Sec13-35	487.767	290	12.273	6.611	75.37	12.9709	42.48	55.39	2.12
Sec13-37	489.957	291.475	13.274	6.9309	76.25	11.5908	37.15	61.76	1.09
Sec13-39	492.417	292.951	9.357	9.46	70.55	17.7404	64.35	30.2	5.45
Sec13-41	494.877	294.426	11.959	11.933	61.25	15.1503	56.74	21.89	21.37
Sec13-43	497.337	295.901	11.969	13.531	72.88	14.1608	44.92	47.62	7.47
Sec13-45	499.797	297.349	10.936	6.771	68.58	15.6003	54.92	34.09	10.99
Sec13-47	502.211	298.713	11.622	8.462	76.09	14.331	43.99	53.97	2.05
Sec13-49	504.486	300.077	11.083	8.122	78.6	14.861	45.14	54.86	0
Sec13-51	506.761	301.442	11.097	17.152	78.52	14.8203	45.21	54.79	0
Sec13-53	509.036	302.813	10.877	12.0009	75.09	15.061	49.62	48.15	2.23
Sec13-55	511.324	304.208	13.139	0	71.57	13.0009	40.84	49.19	9.97
Sec13-57	513.649	305.602	14.435	9.051	62.31	16.0409	44.97	28.93	26.1
Sec13-59	515.974	306.996	13.637	13.552	70.11	12.7908	40.76	46.02	13.22
Sec13-61	518.299	308.381	11.673	12.04	79.71	13.8409	40.95	59.05	0
Sec13-63	520.607	309.736	10.665	8.3708	78.18	15.1803	47.97	52.03	0
Sec13-65	522.867	311.091	11.438	10.38	78.81	14.7903	41.98	58.02	0
Sec13-67	525.127	312.447	13.005	13.862	82.71	11.8008	31.38	68.62	0
Sec13-69	527.387	313.802	12.926	9.54	83.27	11.4708	31.4	68.6	0
Sec13-71	529.647	315.16	10.967	8.632	81.35	13.8809	44.66	55.34	0
Sec13-73	531.911	316.524	14.224	8.612	79.16	11.8108	29	69.58	1.42
Sec13-75	534.186	317.888	15.424	3.9105	76.93	10.942	26.47	66.91	6.62
Sec13-77	536.461	319.253	14.491	2.433	76.9	10.872	30.03	63.59	6.38
Sec13-79	538.736	320.609	15.238	4.92	76.32	10.692	27.8	64.56	7.64
Sec13-81	540.999	321.944	13.469	4.895	80.72	11.8409	30.47	69.53	0
Sec13-83	543.224	323.278	11.82	3.943	79.81	13.6009	40.04	59.96	0
Sec13-85	545.449	324.612	11.655	6.196	79.32	13.731	41.38	58.62	0
Sec13-87	547.674	325.952	13.891	4.8109	78.45	12.092	30.51	68.1	1.39
Sec14-1	549.907	327.307	13.399	5.572	74.45	13.631	35.96	57.77	6.27
Sec14-3	552.167	328.663	15.322	7.981	74.65	11.822	28.62	62.89	8.49
Sec14-5	554.427	330.018	13.146	3.165	80.61	12.6309	32.19	67.81	0
Sec14-7	556.687	331.373	13.411	2.3209	79.64	11.9009	31.79	68.05	0.15
Sec14-9	558.947	332.731	13.209	4.77	79.63	12.2509	32.55	67.45	0
Sec14-11	561.211	334.095	20.725	8.24	74.74	8.101	14.5	69.66	15.84
Sec14-13	563.486	335.46	16.579	6.98	77.8	10.202	22.14	69.76	8.1
Sec14-15	565.761	336.824	5.261	4.334	68.184	31.8205	100	0	0
Sec14-17	568.036	338.192	12.48	7.87006	76.74	14.1903	38.47	57.8	3.74
Sec14-19	570.317	339.571	12.458	4.974	72.77	13.681	42.84	48.52	8.64
Sec14-21	572.617	341	11.174	4.8407	72.38	15.6003	48.99	43.63	7.37
Sec14-23	574.917	342.201	10.622	4.9606	75.49	16.1703	49.52	47.91	2.57
Sec14-25	577.217	343.447	11.65	3.6203	75.34	14.2603	44.35	51.52	4.13
Sec14-27	579.517	344.686	10.39	3.891	69.66	16.4703	56.3	33.88	9.82
Sec14-29	581.805	345.905	10.535	7.57	74.14	16.3104	51.38	44.82	3.8
Sec14-31	584.055	347.124	11.551	8.3009	77.07	14.281	43.21	53.9	2.89
Sec14-33	586.305	348.342	11.013	11.211	75.06	16.3203	46.45	49.12	4.44
Sec14-35	588.555	349.562	9.05	16.67	75.02	21.0706	57.39	42.61	0
Sec14-37	590.807	350.787	8.304	11.001	75.37	22.1906	65.59	34.41	0
Sec14-39	593.067	352.011	8.886	17.06	73.74	21.3406	59.86	39.57	0.57
Sec14-41	595.327	353.235	9.992	18.0209	77.33	17.7704	51.11	48.89	0
Sec14-43	597.587	354.459	9.457	13.1902	77.58	18.4704	55.21	44.79	0
Sec14-45	599.847	355.685	10.516	18.441	76.07	17.7204	48.08	50.66	1.25
Sec14-47	602.111	356.918	8.679	27.371	73.98	21.2306	62.59	37.41	0
Sec14-49	604.386	358.15	8.504	0.0006	72.59	21.8607	65.52	34.48	0
Sec14-51	606.661	359.382	9.367	17.362	72.8	19.1806	58.83	37.59	3.58
Sec14-53	608.936	360.611	8.777	67.68	76.43	20.3906	60.78	39.22	0
Sec14-55	611.205	361.83	8.063	20.9809	74.59	23.0807	66.37	33.63	0
Sec14-57	613.455	363.049	9.131	13.621	76.01	19.2405	58.07	41.93	0
Sec14-59	615.705	364.267	10.421	12.8904	73.93	17.8204	49.96	44.67	5.37
Sec14-61	617.955	365.498	10.597	14.9803	75.96	17.0604	48.08	50.12	1.8
Sec14-63	620.227	366.766	9.951	12.952	77.66	18.0104	50.68	49.32	0
Sec14-65	622.567	368.033	11.921	14.671	76.13	16.0103	40.22	54.56	5.22
Sec14-67	624.907	369.301	11.11	8.86	79.42	15.5704	42.75	57.25	0
Sec14-69	627.247	370.568	10.428	7.9505	79.07	16.0703	48.38	51.62	0
Sec14-71	629.587	371.817	10.288	9.092	78.34	16.7104	49.36	50.64	0
Sec14-73	631.892	373.008	8.63	7.22	76.37	19.9905	64.42	35.58	0
Sec14-75	634.092	374.2	10.513	5.682	80.49	15.6503	47.36	52.64	0
Sec14-77	636.292	375.392	12.584	10.5608	79.53	12.891	35.8	64.2	0
Sec14-79	638.492	376.678	11.284	7.07	76.78	14.9203	44.77	55.23	0
Sec14-81	640.867	378.249	14.018	7.55	75.65	13.141	32.22	62.5	5.27
Sec14-83	643.767	379.82	14.061	12.97	70.69	12.6409	37.85	49.39	12.76
Sec14-85	646.667	380	14.725	17.35	76.76	12.2209	28.13	67.25	4.62
